# Supplementary material
Source: Springer Nature journal article supplement (https://www.springermedizin.de/resource/supplementary/13012_2013_648_MOESM4_ESM.pdf/9630450)

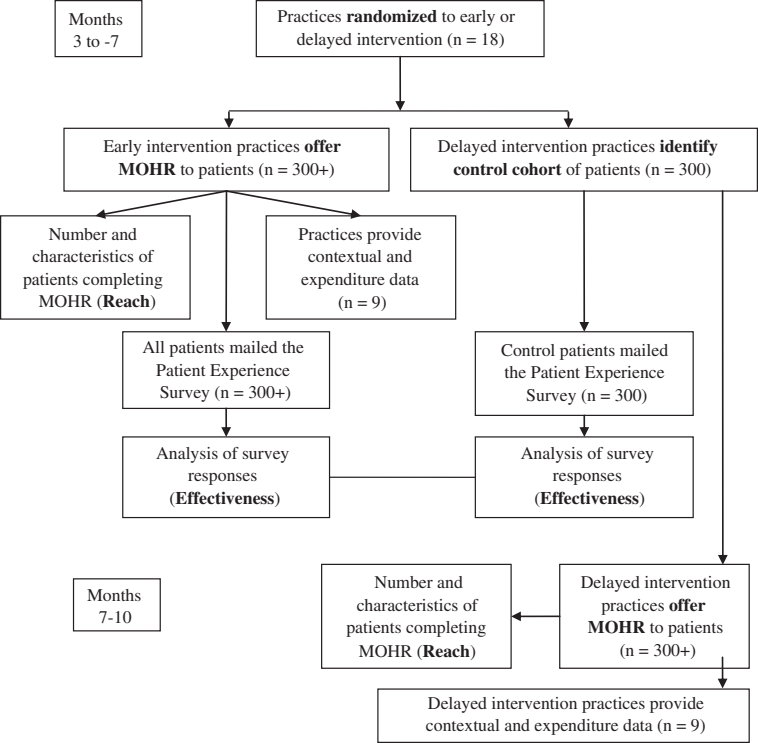

Supplement: MOESM4 [file 9630450]
